# Supplementary material for: Engineering chiral plasmonic nanostructures for gain-assisted plasmon amplification and tunable enhancement of circular dichroism
Source: Royal Society of Chemistry journal article supplement (doi:10.1039/d1ma01067k), 2021-12-30
Supplement: d1ma01067k1.pdf [file d1ma01067k1.pdf]

## Supplementary Information

### Engineering chiral plasmonic nanostructures for gain-assisted plasmon amplification and tunable enhancement of circular dichroism

Vikas,<sup>a</sup> and Soumik Siddhanta<sup>a\*</sup>

<sup>a</sup>Department of Chemistry, Indian Institute of Technology Delhi, Hauz Khas, New Delhi- 110016, India.

\*E-mail: [soumik@iitd.ac.in](mailto:soumik@iitd.ac.in)

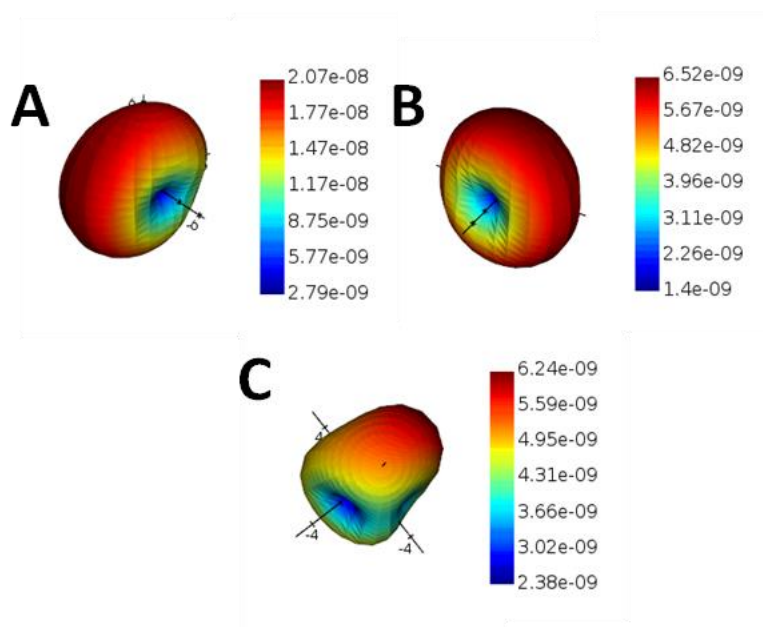

**Figure S1:** Calculated far-field profiles of the gold nanorod dimer-1. (A) Dimer excited by RCP at anti-bonding wavelength of 709 nm, and at bonding wavelength of 774 nm (B). (C) Off resonance excitation at 650 nm of the gold nanorod dimer.

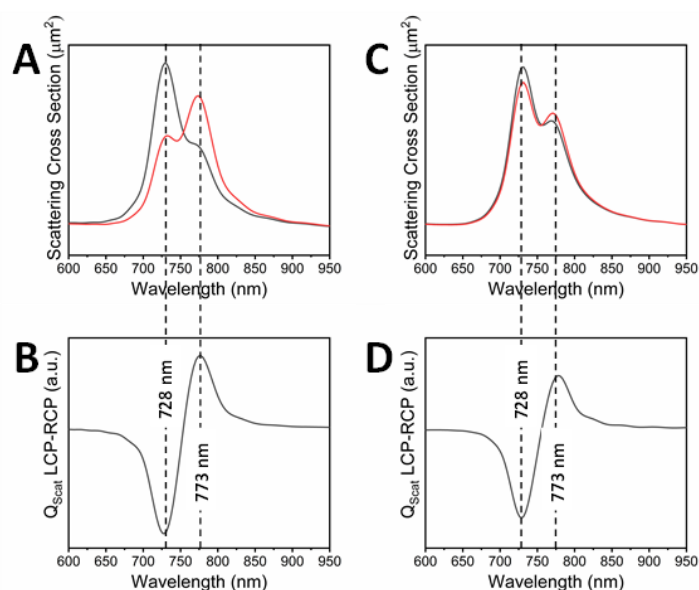

**Figure S2:** The circular dichroism spectra (for dimer-2) emerging from the difference between the scattering of LCP (black) and RCP (red) light (A) at normal incidence and (C) at oblique incidence giving rise to a bisignate form of the spectrum (B) at normal incidence and (D) at oblique incidence.

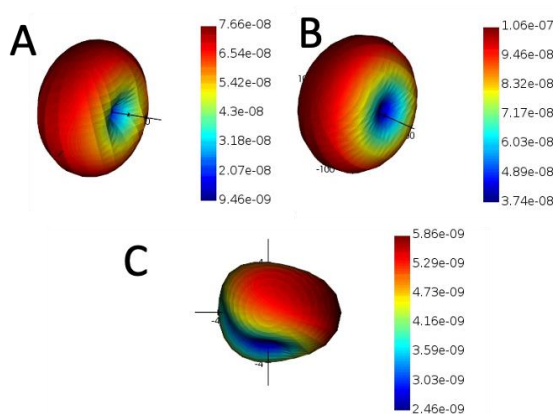

**Figure S3:** Calculated far-field profiles of the gold nanorod dimer-1 with a gain medium of thickness 5 nm with a critical  $k$  value of 0.104. (A) Dimer excited by LCP at anti-bonding wavelength, and at bonding wavelength (B). (C) Off resonance excitation at 650 nm of the gold nanorod dimer with 5nm coating of gain medium.

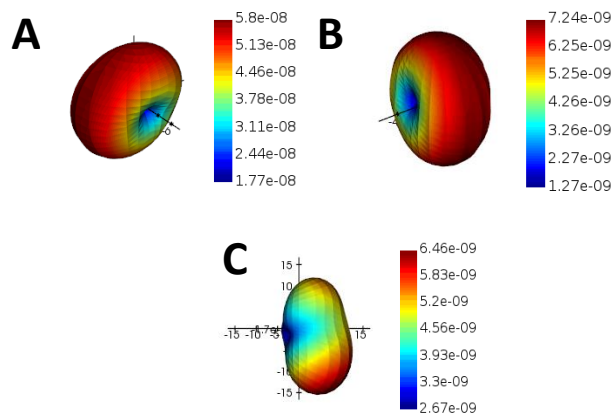

**Figure S4:** Calculated far-field profiles of the gold nanorod dimer-1 with a gain medium of thickness 5 nm with a critical  $k$  value of 0.104. (A) Dimer excited by RCP at anti-bonding wavelength, and at bonding wavelength (B). (C) Off resonance excitation at 650 nm of the gold nanorod dimer with 5nm coating of gain medium.

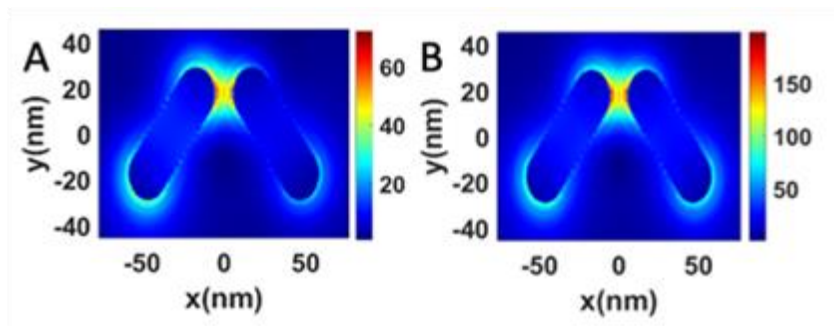

**Figure S5:** (A) Near-field intensity of 5 nm silica coated v-shaped nanorod assembly (dimer-1), and (B) when the gain coefficient,  $k$  of the silica layer is at its critical value of 0.104. The excitation was through LCP light at bonding wavelengths.

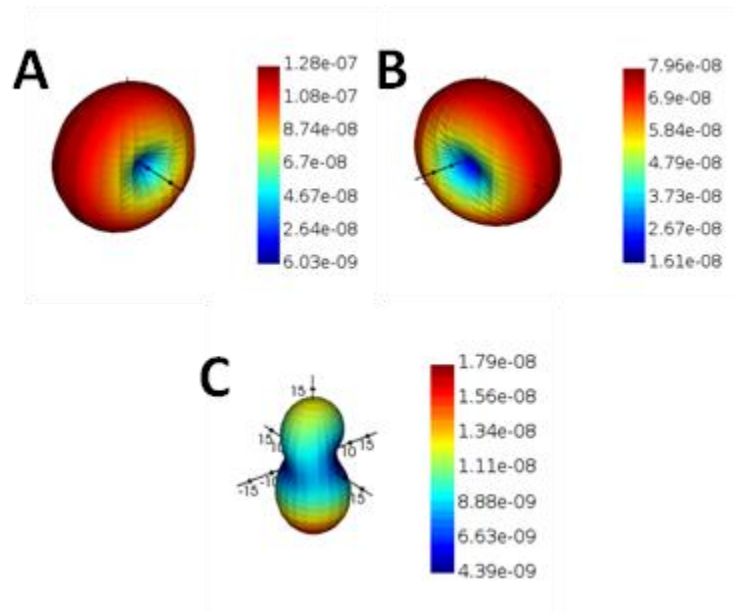

**Figure S6:** Calculated far-field profiles of the gold nanorod dimer-2 (angle of incidence 0 degree) with a gain medium of thickness 5 nm with a critical k value of 0.150. (A) Dimer excited by LCP at anti-bonding wavelength (728 nm), and at bonding wavelength (773 nm) (B). (C) Off resonance excitation at 600 nm of the gold nanorod dimer with 5nm coating of gain medium.

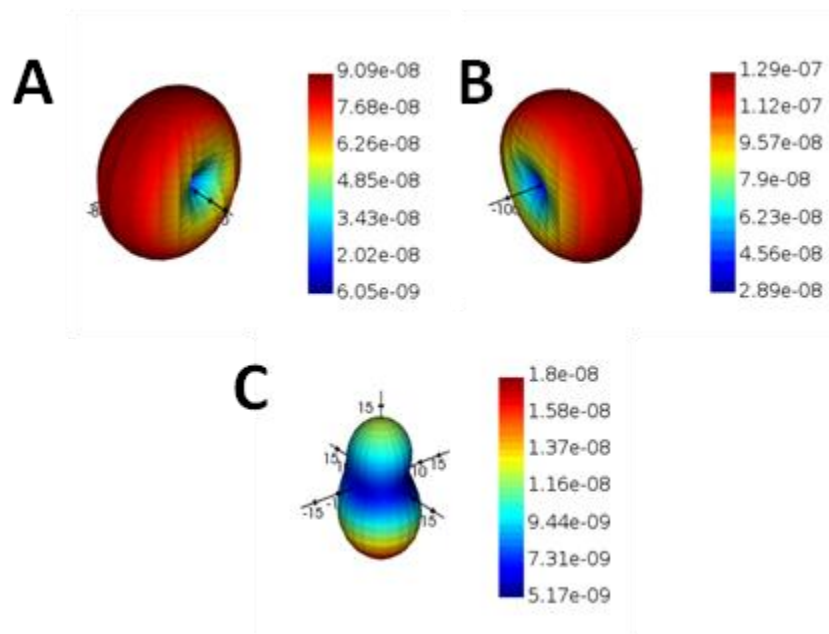

**Figure S7:** Calculated far-field profiles of the gold nanorod dimer-2 (angle of incidence 0 degree) with a gain medium of thickness 5 nm with a critical k value of 0.150. (A) Dimer excited by RCP at anti-bonding wavelength (728 nm), and at bonding wavelength (773 nm) (B). (C) Off resonance excitation at 600 nm of the gold nanorod dimer with 5nm coating of gain medium.

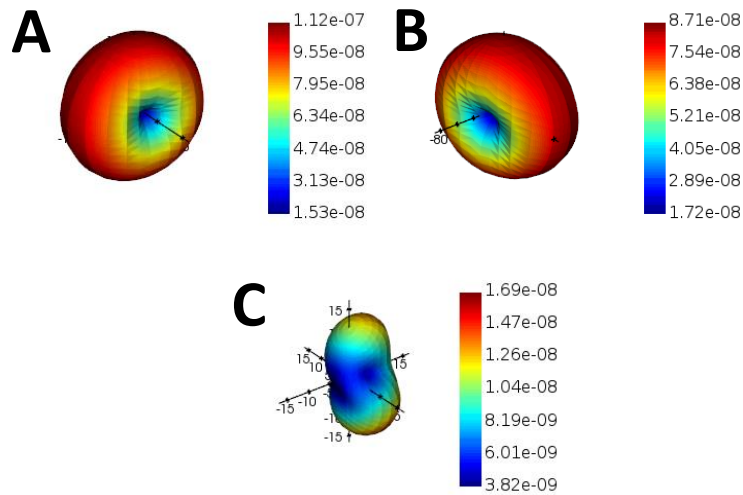

**Figure S8:** Calculated far-field profiles of the gold nanorod dimer-2 with a gain medium of thickness 5 nm with a critical  $k$  value of 0.147. (A) Dimer excited by LCP at anti-bonding wavelength (728 nm), and at bonding wavelength (773 nm) (B). (C) Off resonance excitation at 600 nm of the gold nanorod dimer with 5nm coating of gain medium.

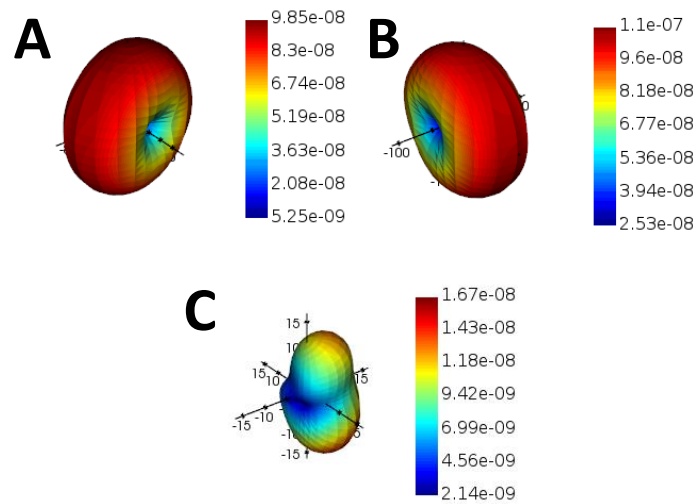

**Figure S9:** Calculated far-field profiles of the gold nanorod dimer-2 with a gain medium of thickness 5 nm with a critical  $k$  value of 0.147. (A) Dimer excited by RCP at anti-bonding wavelength (728 nm), and at bonding wavelength (773 nm) (B). (C) Off resonance excitation at 600 nm of the gold nanorod dimer with 5nm coating of gain medium.

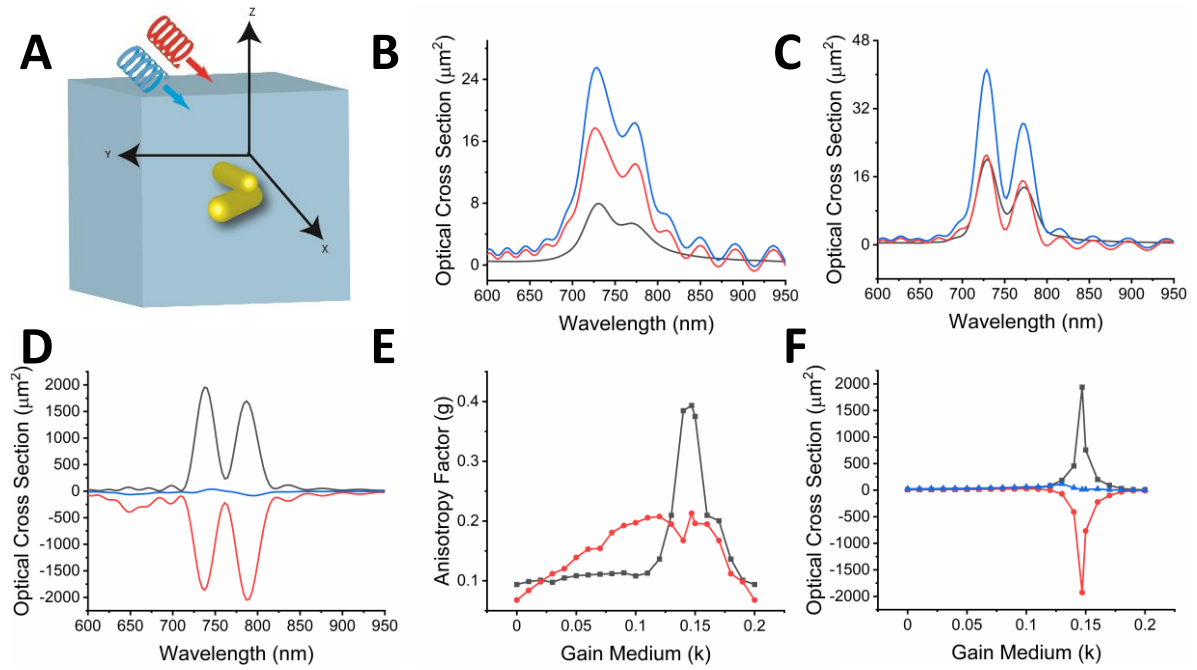

**Figure S10:** The simulation setup showing the twisted gold nanorod assembly showing intrinsic chirality (dimer-2). Figures (B-D) represents absorbance, scattering and extinction of nanorod systems with  $k$  values of 0, 0.07 and 0.147 respectively. Calculated absorbance (red), scattering (black) and extinction (blue) are shown for a gold nanorod dimer system immersed in water and with right circularly polarized light incident at oblique incidence of  $60^\circ$ . (E) The calculated anisotropy factor ( $g$ ) with different  $k$  values. The black and red curves show the trend of bonding and anti-bonding modes respectively. (F) The calculated optical cross-section as a function of different values of  $k$ -values around the critical point of 0.147.

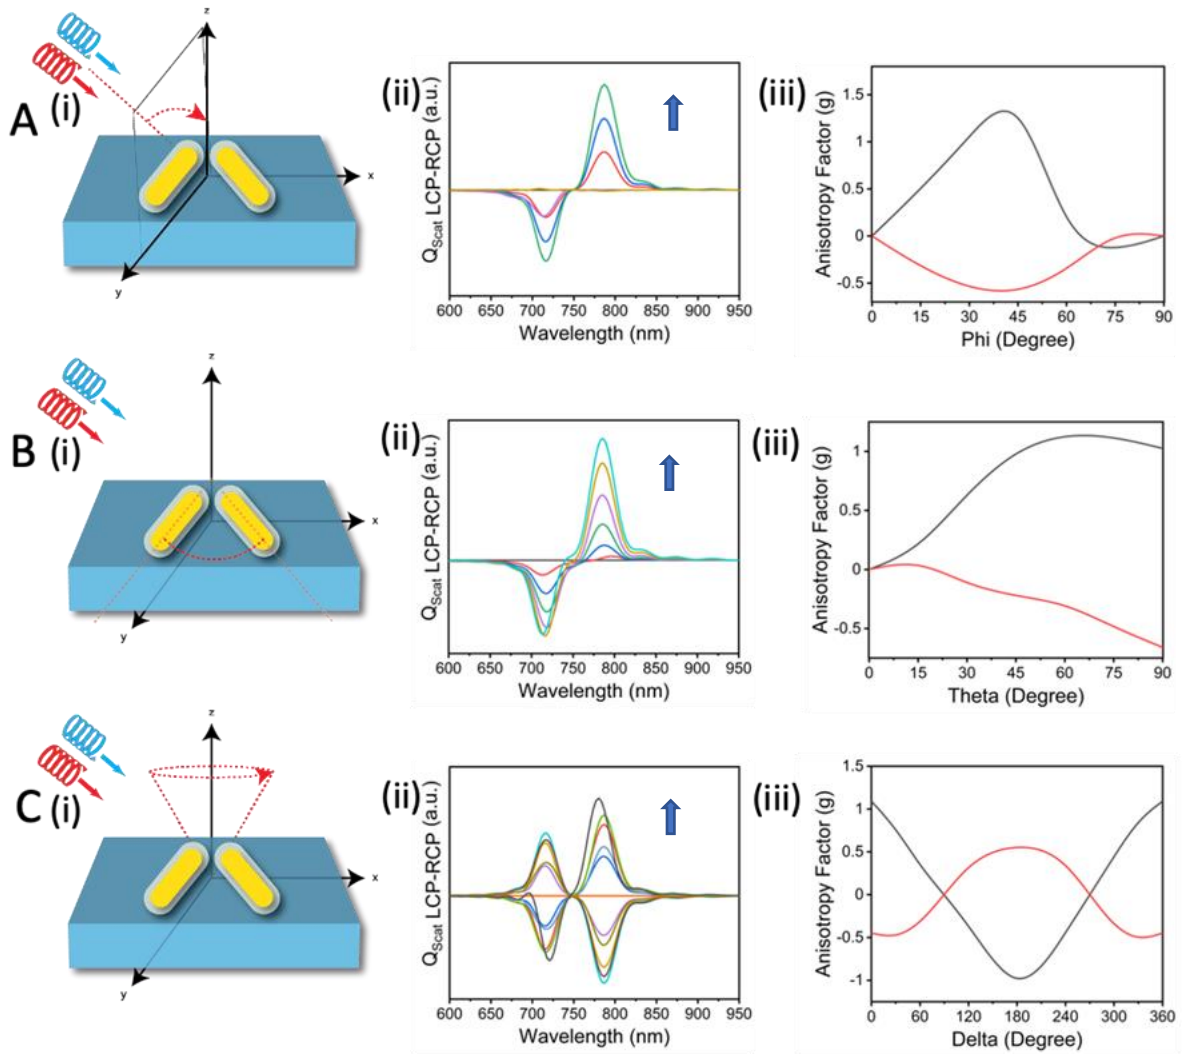

**Figure S11:** The variation of CD signals with various angles of incidence of LCP and RCP light and also the angle between the gold nanorods with 5 nm gain medium at critical value of gain coefficient  $k$ . The arrow represent that the value of  $Q_{\text{Scat}}$  is increasing in that direction from 0 to 0.104.
